# Supplementary material
Source: Research Square preprint supplement (doi:10.21203/rs.3.rs-8808459/v1)
Supplement: Supplementary file 1 [file 43ba99b8534af6ea194e83ac.docx]

**Table S1.** *Linear Regressions Predicting Cognitive Outcomes.* Significant predictors are reported for significant models.

| **Outcome** | **R²** | **F** | **M p-value** | **Sig. predictors** | **B (coeff.)** | **P p-value** |
| --- | --- | --- | --- | --- | --- | --- |
| MoCA | .000 | 0.918 | .500 |  |  |  |
| ItFNAT DFRs | .025 | 2.082 | .035 | Living with ≥2 people | 0.874 | .006 |
| SET | .071 | 6.267 | < .001 | Widowed | -3.355 | < .001 |
|  |  |  |  | Living with ≥2 people | 0.854 | .003 |
|  |  |  |  | LSNS | 0.106 | .003 |
| SCD-Q | .126 | 11.762 | < .001 | UCLA-LS | 0.154 | < .001 |
| **Note: M p-value:** Model p-value; **P p-value:** Predictor p-value; **MoCA:** Montreal Cognitive Assessment total score adjusted according to Santangelo et al. (2015); **ItFNAT DFRs:** Italian Face-Name Association Test Delayed Free Recall score adjusted according to Manippa et al. (2025); **SET:** Story-based Empathy Task total score adjusted according to Dodich et al. (2015); **SCD-Q:** Subjective Cognitive Decline Questionnaire score; **LSNS:** Lubben Social Network Scale; **UCLS-LS:** UCLA Loneliness Scale.  **Table S2.** *Sociodemographics and Neuropsychological characteristics of Cognitivly Healthy (CH) and Cogntively Impaired (CI) groups.*   |  | **CH (45 F; 23 M)** | | **CI (48 F; 25 M)** | | **Between group comparisons** | | | --- | --- | --- | --- | --- | --- | --- | |  | **M** | **SD** | **M** | **SD** | **t** | **p-value** | | Age (y) | 63.13 | 7.23 | 65.37 | 7.95 | -1.745 | .083 | | Education (y) | 12.25 | 3.70 | 10.82 | 4.97 | 1.795 | .075 | | CRIq Total | 103.27 | 16.22 | 93.36 | 20.58 | 3.153 | .002 | | MoCA Total | 25.27 | 2.85 | 20.33 | 4.83 | 7.320 | < .001 | | FAB | 16.13 | 1.92 | 13.90 | 3.05 | 5.150 | < .001 | | FAQ | 1.16 | 2.26 | 4.23 | 5.68 | -4.165 | < .001 | | Phonemic Fluency | 39.13 | 9.43 | 28.03 | 12.93 | 5.792 | < .001 | | Semantic Fluency | 46.68 | 8.34 | 36.66 | 9.44 | 6.657 | < .001 | | FCSRT IFR | 31.22 | 17.38 | 20.15 | 10.55 | 4.608 | < .001 | | FCSRT DFR | 11.49 | 2.64 | 7.36 | 4.67 | 6.402 | < .001 | | TMT A (seconds) | 58.56 | 23.55 | 93.53 | 54.89 | -4.838 | < .001 | | TMT B (seconds) | 112.40 | 49.12 | 225.45 | 137.92 | -6.323 | < .001 | | TMT B-A (seconds) | 53.84 | 35.81 | 137.52 | 109.98 | -5.931 | < .001 | | ROCFT Copy | 34.57 | 1.83 | 29.09 | 7.81 | 5.643 | < .001 | | ROCFT DR | 18.59 | 5.57 | 11.09 | 7.11 | 6.919 | < .001 | | DIGIT-F | 5.56 | 1.04 | 4.92 | 1.15 | 3.457 | < .001 | | DIGIT-B | 4.27 | 1.02 | 3.12 | 1.48 | 5.298 | < .001 | | BNT | 12.87 | 1.63 | 10.41 | 2.67 | 6.535 | < .001 | | SCWT Time | 20.48 | 9.90 | 37.93 | 27.96 | -4.864 | < .001 | | SCWT Errors | 0.83 | 2.03 | 3.60 | 6.72 | -3.263 | .001 | | SET | 14.91 | 2.89 | 13.17 | 4.06 | 2.878 | .005 | | ltFNAT IR | 4.06 | 2.59 | 2.51 | 2.31 | 3.012 | .003 | | ltFNAT DFR | 4.83 | 3.51 | 2.49 | 2.23 | 4.137 | <.001 | | ltFNAT DTR | 11.52 | 3.10 | 10.13 | 2.69 | 2.503 | .014 | | HADS Depression | 4.90 | 3.21 | 5.25 | 4.29 | -0.544 | .587 | | HADS Anxiety | 5.16 | 3.09 | 5.80 | 4.61 | -0.950 | .344 | | NPI Severity | 2.02 | 4.07 | 4.14 | 5.23 | -2.662 | .009 | | NPI Caregiver Stress | 1.02 | 3.66 | 4.32 | 7.10 | -3.412 | < .001 | | SCD-Q | 6.72 | 4.87 | 8.63 | 6.06 | -2.035 | .044 |   **Note: CRIq:** Cognitive Reserve Index Questionnaire-Short; **MoCA:** Montreal Cognitive Assessment; **FAB:** Frontal Assessment Battery; **FAQ:** Functional Activity Questionnaire; **FCSRT:** Free and Cued Selective Reminding Test Immediate Free Recall (IFR) and Delayed Free Recall (DFR); **TMT:** Trail Making Test; **ROCT:** Rey-Osterrieth Complex Figure Test Copy and Delayed Recall (DR); Digit Span Forward (F) and Backward (B); **BNT:** Boston Naming Test; **SCWT:** Stroop Colour-Word Test; **SET:** Story-based Empathy Task; **ItFNAT:** Italian Face-Name Association Test Immediate Recall (IR), Delayed Free Recall (DFR) and Delayed Total Recall (DTR); **HADS:** Hospital Anxiety and Depression Scale; **NPI:** Neuropsychiatric Inventory; **SCD-Q:** Subjective Cognitive Decline-Questionnaire.  **Table S3.** Pearson’s correlation between affective social connectedness measures in whole sample, Cognitively Healthy (CH) and Cognitively Impaired (CI) groups.   |  |  | Whole sample | |  | CH | |  | CI | | | --- | --- | --- | --- | --- | --- | --- | --- | --- | --- | | Variabile 1 | Variabile 2 | r | p-value |  | r | p-value |  | r | p-value | | Depression | Anxiety | 0.515 | < .001 |  | 0.621 | < .001 |  | 0.464 | < .001 | |  | UCLA-LS | 0.456 | < .001 |  | 0.485 | < .001 |  | 0.444 | < .001 | |  | LSNS | -0.207 | .015 |  | -0.149 | .226 |  | -0.247 | .038 | | Anxiety | UCLA-LS | 0.522 | < .001 |  | 0.417 | < .001 |  | 0.597 | < .001 | |  | LSNS | -0.106 | .215 |  | -0.054 | .659 |  | -0.124 | .304 | | UCLA-LS | LSNS | -0.229 | .007 |  | -0.295 | .014 |  | -0.184 | .125 |   **Note: LSNS:** Lubben Social Network Scale; **UCLS-LS:** UCLA Loneliness Scale | | | | | | |

**Table S4.** *Results of the multivariate analysis of variance (MANOVA) and univariate analyses of variance (ANOVA) examining the effects of living arrangement, marital status, and group on social network size (LSNS) and loneliness (UCLA-LS).*

|  | **MANOVA (LSNS, UCLA-LS)** | | | | |  | **ANOVA LSNS** | |  | **ANOVA UCLA-LS** | |
| --- | --- | --- | --- | --- | --- | --- | --- | --- | --- | --- | --- |
| *Case / Factor* | *Pillai Trace* | *Approx. F* | *Num df* | *Den df* | *p-value* |  | *F* | *p-value* |  | *F* | *p-value* |
| Intercept | 0.961 | 1644.06 | 2 | 132 | < .001 |  | 837.268 | < .001 |  | 1,748.00 | < .001 |
| Living arrangment | 0.028 | 1.892 | 2 | 132 | .155 |  | 3.495 | .064 |  | 0.953 | .331 |
| Marital status | 0.013 | 0.291 | 6 | 266 | .941 |  | 0.257 | .856 |  | 0.272 | .846 |
| Group | 0.036 | 2.5 | 2 | 132 | .086 |  | 4.472 | .036 |  | 0.061 | .805 |
| Residuals | – | – | – | – | – |  | – | – |  | – | – |

**Table S4.** *Logistic Regression run on Group (CH= 0, CI= +1)*

| *Δχ28 = 10.15, p = .255; AIC = 200.49; BIC = 226.90; R² McFadden = 0.05* | | | | | |
| --- | --- | --- | --- | --- | --- |
| **Predictors** | **Estimate** | **SE** | **z** | **Wald χ²** | **p** |
| Intercept | 2.715 | 1.330 | 2.042 | 4.169 | .041 |
| UCLA-LS | −0.024 | 0.019 | −1.299 | 1.688 | .194 |
| LSNS | −0.068 | 0.031 | −2.183 | 4.767 | .029 |
| Depression | 0.007 | 0.056 | 0.121 | 0.015 | .904 |
| Anxiety | 0.066 | 0.058 | 1.134 | 1.286 | .257 |
| Marital status (Married) | −0.927 | 0.942 | −0.984 | 0.969 | .325 |
| Marital status (Divorced) | −1.558 | 1.012 | −1.540 | 2.371 | .124 |
| Marital Status (Widowed) | −1.041 | 1.009 | −1.032 | 1.066 | .302 |
| Living arrangement (Alone) | −0.354 | 0.685 | −0.516 | 0.266 | .606 |

**Note: LSNS:** Lubben Social Network Scale; **UCLS-LS:** UCLA Loneliness Scale.

**Table S5.** *Linear Regressions Predicting Cognitive Outcomes.* Significant predictors are reported for significant models.

| **Outcome** | **R²** | **F** | **M p-value** | **Sig. predictors** | **B (coeff.)** | **P p-value** |
| --- | --- | --- | --- | --- | --- | --- |
| ItFNAT DFRs | .127 | 8.348 | < .001 | Group | -2.231 | < .001 |
| SET | .083 | 1.941 | .079 |  |  |  |
| SCD-Q | .138 | 5.305 | < .001 | Depression | 0.346 | .016 |

**Note: M p-value:** Model p-value; **P p-value:** Predictor p-value; **ItFNAT DFRs:** Italian Face-Name Association Test Delayed Free Recall score adjusted according to Manippa et al. (2025); **SET:** Story-based Empaty Task total score adjusted according to Dodich et al. (2015); **SCD-Q:** Subjective Cognitive Decline Questionnaire score.
